# Supplementary material
Source: PubMed Central journal article supplement (PMC1277811)

FITC-sc10,986 DNA electroporated to COLO 320DM cells

0 hr

4 hr

48 hr

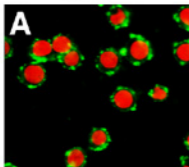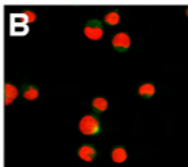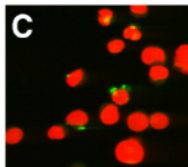

Phase Contrast

FITC-pGeneGrip

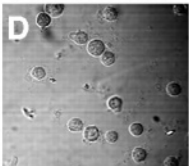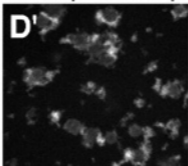

FITC-sc5,063 DNA  
electroporated to  
COLO 320DM cells

FITC-sc3,162 DNA lipofected to MEF p53<sup>-/-</sup> cells

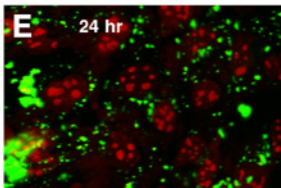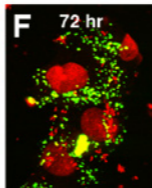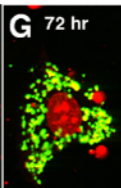

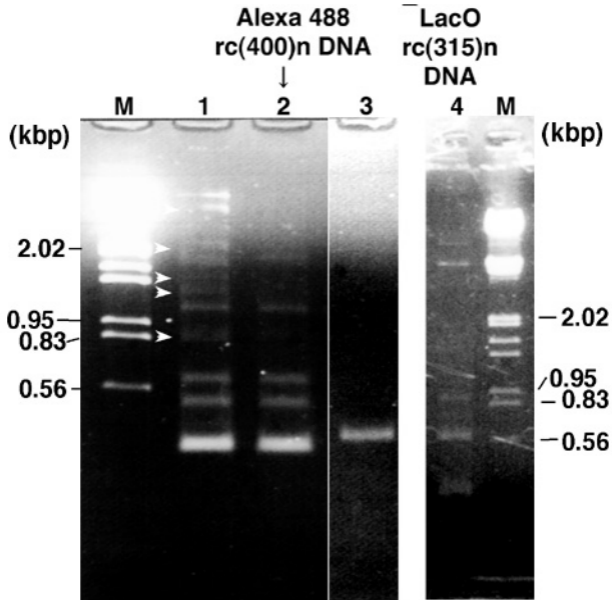

(MEF p53+/+)

3 min

1 hr

2 hr

7 hr

20 hr

44 hr

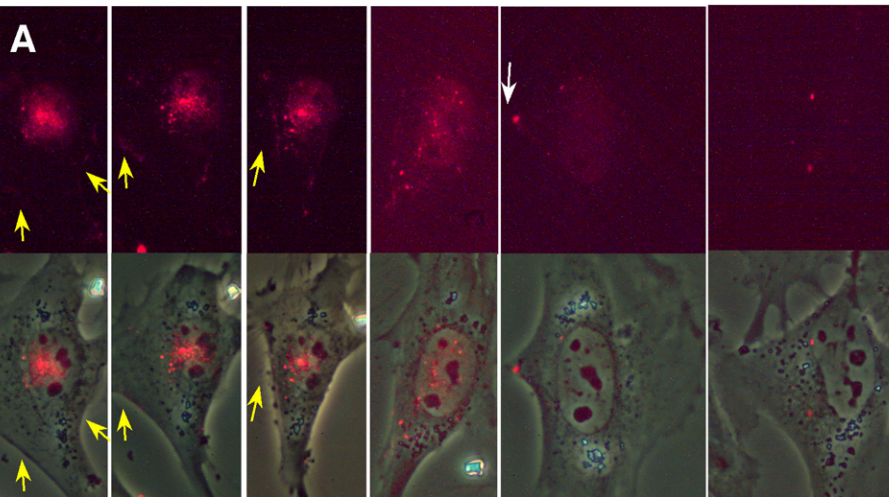

(HeLa

LacR-GFP)

5 min

3 hr

7 hr

12 hr

20 hr

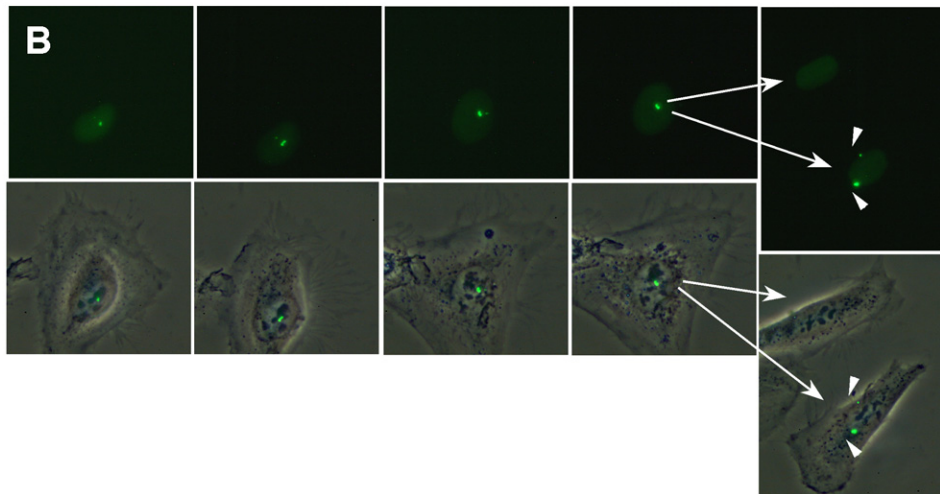

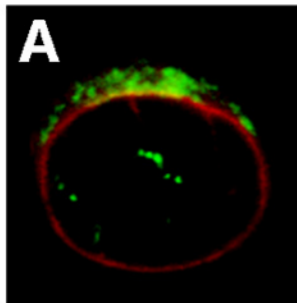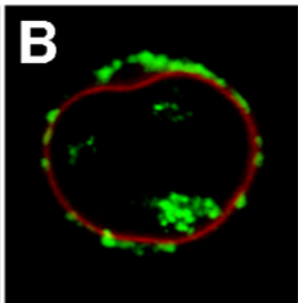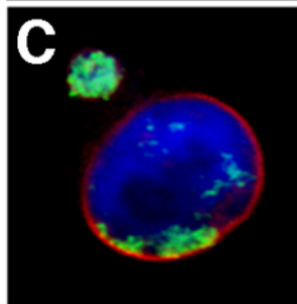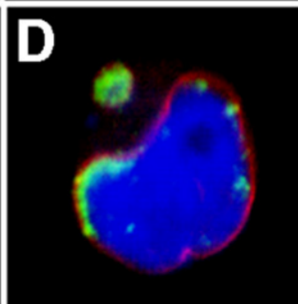

Supplement: nar_33_19_6296__1.pdf [file nar_33_19_6296__1.pdf]
